# Supplementary material for: Anabaenopeptins from Cyanobacteria in Freshwater Bodies of Greece
Source: MDPI journal article supplement (doi:10.3390/toxins14010004), 2021-12-21
Supplement: s1 [file s1]

# Supplementary Materials: Anabaenopeptins from cyanobacteria in freshwater bodies of Greece

Sevasti-Kiriaki Zervou, Triantafyllos Kaloudis, Spyros Gkelis, Anastasia Hiskia and Hanna Mazur-Marzec

**Table S1.** List of Anabaenopeptins reported in the literature and their amino acid sequence.

|    | Name                                     | <i>m/z</i><br>[M+H] <sup>+</sup> | Amino acids sequence |                |     |         |     |       |         | Ref.       |
|----|------------------------------------------|----------------------------------|----------------------|----------------|-----|---------|-----|-------|---------|------------|
|    |                                          |                                  | 1<br>(Side chain)    | Ureido linkage | 2   | 3       | 4   | 5     | 6       |            |
| 1  | Anabaenopeptin 679                       | 678.3618<br>[M-H] <sup>-</sup>   | NH <sub>2</sub>      | CO             | Lys | Val     | Hty | MeAla | Phe     | [1]        |
| 2  | Anabaenopeptin 731                       | 732.3922                         | Phe                  | CO             | Lys | Val     | Leu | MeGly | AcSer   | [2]        |
| 3  | Anabaenopeptin I                         | 760.4618                         | Ile                  | CO             | Lys | Val     | Hty | MeAla | Leu     | [3]        |
| 4  | Nostamide C                              | 778.4497                         | Ile                  | CO             | Lys | Val     | Hph | MeAla | Phe     | [4]        |
| 5  | Nostamide D                              | 778.4498                         | Val                  | CO             | Lys | Ile     | Hph | MeAla | Phe     | [4]        |
| 6  | Nostamide E                              | 778.4498                         | Ile                  | CO             | Lys | Ile     | Hph | Ala   | Phe     | [4]        |
| 7  | Anabaenopeptin 788                       | 789.4425                         | Val                  | CO             | Lys | Val     | Trp | MeAla | Phe     | [5]        |
| 8  | Schizopeptin 791                         | 792                              | Ile                  | CO             | Lys | Ile     | Hph | MeAla | Phe     | [6]        |
| 9  | Anabaenopeptin J                         | 794.4462                         | Ile                  | CO             | Lys | Val     | Hty | MeAla | Phe     | [3]        |
| 10 | Anabaenopeptin 802A                      | 803.4417                         | Val                  | CO             | Lys | Ile     | Trp | MeAla | Phe     | [7]        |
| 11 | Anabaenopeptin 802B                      | 803                              | Arg                  | CO             | Lys | Val     | Hty | MeAla | Leu/Ile | [8]        |
| 12 | Anabaenopeptin 802C                      | 803.4417                         | Val                  | CO             | Lys | Leu     | Trp | MeAla | Phe     | [5]        |
| 13 | Anabaenopeptin 803                       | 804.4353                         | Leu/Ile              | CO             | Lys | Met     | Leu | Melle | Met(O)  | [2]        |
| 14 | Nostamide B                              | 806.4810                         | Ile                  | CO             | Lys | Ile     | Hph | MeAla | Hph     | [4]        |
| 15 | Nodulapeptin 807                         | 808                              | Ile                  | CO             | Lys | Val     | Hph | MeHph | Ser     | [9]        |
| 16 | Anabaenopeptin 807                       | 808                              | Ile                  | CO             | Lys | Ile     | Hty | MeAla | Phe     | [10]       |
| 17 | Anabaenopeptin 808                       | 808                              | Ile                  | CO             | Lys | Val     | Hty | MeAla | Hph     | [11]       |
| 18 | Anabaenopeptin C                         | 809.4629                         | Lys                  | CO             | Lys | Val     | Hty | MeAla | Phe     | [12, 13]   |
| 19 | Anabaenopeptin 809                       | 810                              | Tyr                  | CO             | Lys | Val     | Hty | MeAla | Leu/Ile | [8]        |
| 20 | Anabaenopeptin KVJ841                    | 812.4348                         | Tyr                  | CO             | Lys | Ile     | Hph | MeGly | Hph     | [14]       |
| 21 | Paltolide A                              | 812.4783                         | Arg                  | CO             | Lys | Ala     | Leu | Leu   | Trp     | [15]       |
| 22 | Anabaenopeptin 813                       | 814                              | Phe                  | CO             | Lys | Val     | Hty | MeGly | Phe     | [16]       |
| 23 | Anabaenopeptin 816                       | 817.4425                         | Ile/Leu              | CO             | Lys | Ile/Leu | Trp | MeAla | Phe     | [5]        |
| 24 | Anabaenopeptin 820                       | 821.47                           | Arg                  | CO             | Lys | Val     | Hph | MeAla | Phe     | [17]       |
| 25 | Nodulapeptin 821                         | 822                              | Ile                  | CO             | Lys | Ile     | Hph | MeHph | Ser     | [9]        |
| 26 | Anabaenopeptin SA3                       | 823.4718                         | Lys                  | CO             | Lys | Ile     | HTy | Ala   | Phe     | [18]       |
| 27 | Anabaenopeptin 824 /<br>Nodulapeptin 823 | 824                              | Ile                  | CO             | Lys | Val     | Hph | MeHty | Ser     | [11, 16]   |
| 28 | Anabaenopeptin 827 A                     | 828                              | Tyr                  | CO             | Lys | Val     | Hph | MeAla | Phe     | [8]        |
| 29 | Anabaenopeptin 827 B                     | 828.38                           | Phe                  | CO             | Lys | Val     | Hph | Ala   | Hty     | [19]       |
| 30 | Anabaenopeptin KVJ827                    | 828.4282                         | Tyr                  | CO             | Lys | Val     | Hph | MeGly | Hph     | [14]       |
| 31 | Anabaenopeptin D                         | 828.4563                         | Phe                  | CO             | Lys | Val     | Hty | MeAla | Phe     | [12, 13]   |
| 32 | Anabaenopeptin 834                       | 835.31                           | Ile/Leu              | CO             | Lys | Val     | Hph | MeAsn | Hph     | [19]       |
| 33 | Anabaenopeptin SA6                       | 835.4718                         | Ile                  | CO             | Lys | Ile     | Hph | Asn   | Phe     | [18]       |
| 34 | Anabaenopeptin SA5                       | 835.4718                         | Ile                  | CO             | Lys | Val     | PNV | Asn   | Phe     | [18]       |
| 35 | Anabaenopeptin B                         | 837.4629                         | Arg                  | CO             | Lys | Val     | Hty | MeAla | Phe     | [20]       |
| 36 | Anabaenopeptin 837                       | 838.3                            | OEtGlu               | CO             | Lys | Val     | Hty | MeAla | Phe     | This study |
| 37 | Nodulapeptin 839                         | 840                              | Ile                  | CO             | Lys | Met     | Hph | MeHph | Ser     | [9]        |
| 38 | Nostamide A                              | 842                              | Phe                  | CO             | Lys | Ile     | Hph | MeGly | Hty     | [21]       |
| 39 | Anabaenopeptin 841A                      | 842                              | Phe                  | CO             | Lys | Ile     | Hty | MeAla | Phe     | [10]       |
| 40 | Anabaenopeptin 841B                      | 842.4416                         | Phe                  | CO             | Lys | Val     | Hph | MeAla | Hty     | [7]        |
| 41 | Anabaenopeptin KVJ811                    | 842.4449                         | Phe                  | CO             | Lys | Val     | Hph | MeGly | Hph     | [14]       |

|    |                                           |                                 |         |    |     |          |       |                          |                 |            |
|----|-------------------------------------------|---------------------------------|---------|----|-----|----------|-------|--------------------------|-----------------|------------|
| 42 | Paltolide B                               | 842.4888                        | Arg     | CO | Lys | Ala      | Leu   | MeLeu                    | OHTrp           | [15]       |
| 43 | Anabaenopeptin 842                        | 842.7                           | Tyr     | CO | Lys | Ile/Leu  | Hph   | MeAla                    | Phe             | [22]       |
| 44 | Anabaenopeptin SA12                       | 844.4245                        | Phe     | CO | Lys | Val      | HTy   | Gly                      | HTy             | [18]       |
| 45 | Anabaenopeptin A                          | 844.4263                        | Tyr     | CO | Lys | Val      | Hty   | MeAla                    | Phe             | [20]       |
| 46 | Anabaenopeptin MM823                      | 846.4056<br>[M+Na] <sup>+</sup> | OMeGlu  | CO | Lys | Val      | Hty   | MeAla                    | Phe             | [23]       |
| 47 | Anabaenopeptin 848                        | 849.34                          | Ile/Leu | CO | Lys | Val      | MeHph | MeAsn                    | Hph             | [19]       |
| 48 | Anabaenopeptin 848                        | 849.4872                        | Leu     | CO | Lys | Ile      | MeHph | MeAsn                    | Phe             | [7]        |
| 49 | Anabaenopeptin SA7                        | 849.4875                        | Ile     | CO | Lys | Ile      | PNV   | Asn                      | Phe             | [18]       |
| 50 | Nodulapeptin 849                          | 850                             | Ile     | CO | Lys | Val      | Hph   | MeHph                    | AcSer           | [9]        |
| 51 | Anabaenopeptin 849                        | 850.4818                        | Lys     | CO | Lys | Ile      | Hph   | MeAsn                    | Phe             | [7]        |
| 52 | Anabaenopeptin E                          | 851.4763                        | Arg     | CO | Lys | Val      | MeHty | MeAla                    | Phe             | [24]       |
| 53 | Anabaenopeptin DA850                      | 851.4774                        | Arg     | CO | Lys | allo-Ile | Hty   | MeAla                    | Phe             | [25]       |
| 54 | Anabaenopeptin B1                         | 851.4779                        | HArg    | CO | Lys | Val      | Hty   | MeAla                    | Phe             | [26]       |
| 55 | Anabaenopeptin MM850                      | 851.4794                        | OMeArg  | CO | Lys | Val      | Hty   | MeAla                    | Phe             | [23]       |
| 56 | Anabaenopeptin F                          | 851.481                         | Arg     | CO | Lys | Ile      | Hty   | MeAla                    | Phe             | [24]       |
| 57 | Nodulapeptin 851                          | 852                             | Ile     | CO | Lys | Val      | Hph   | MeHph                    | Met             | [8]        |
| 58 | Anabaenopeptin 851                        | 852.2                           | OEtGlu  | CO | Lys | Leu/Ile  | Hty   | MeAla                    | Phe             | This study |
| 59 | Anabaenopeptin 852                        | 852.8                           | MeHty   | CO | Lys | Val      | Hty   | MeAla                    | MeLeu/<br>Melle | [22]       |
| 60 | Anabaenopeptin SA2                        | 853.4572                        | Arg     | CO | Lys | Val      | HTy   | Ser                      | Phe             | [18]       |
| 61 | Anabaenopeptin 855 B                      | 856                             | Phe     | CO | Lys | Val      | Val   | MeHty                    | MetO            | [16]       |
| 62 | Nodulapeptin 855 A                        | 856                             | Ile     | CO | Lys | Met      | Hph   | MeHty                    | Ser             | [10]       |
| 63 | Nodulapeptin 855 B                        | 856                             | Ile     | CO | Lys | MetO     | Hph   | MeHph                    | Ser             | [10]       |
| 64 | Anabaenopeptin 855 A                      | 856.4561                        | Phe     | CO | Lys | Ile      | Hph   | MeAla                    | Hty             | [7]        |
| 65 | Anabaenopeptin 856                        | 856.7                           | MeHty   | CO | Lys | Val      | Hph   | MeAla                    | Phe             | [22]       |
| 66 | Oscillamide Y                             | 858.4396                        | Tyr     | CO | Lys | Ile      | Hty   | MeAla                    | Phe             | [27]       |
| 67 | Anabaenopeptin 857 A                      | 858.4405                        | Phe     | CO | Lys | Val      | Hty   | MeAla                    | Hty             | [7]        |
| 68 | Nodulapeptin 857<br>/Anabaenopeptin 857 B | 858                             | Phe     | CO | Lys | Val      | Hph   | MeHty                    | Ser             | [9, 16]    |
| 69 | Brunsvicamide B                           | 859.5063                        | Ile     | CO | Lys | Ile      | Leu   | MeTrp                    | Phe             | [28]       |
| 70 | Anabaenopeptin SA13                       | 860.4194                        | Tyr     | CO | Lys | Val      | HTyr  | Ser                      | Phe             | [18]       |
| 71 | Mozamide A                                | 861.4875                        | Ile     | CO | Lys | Val      | Leu   | Me-5'-<br>hydroxyT<br>rp | Phe             | [29]       |
| 72 | Anabaenopeptin 862 A                      | 863.26                          | Ile/Leu | CO | Lys | Val      | EtHph | MeAsn                    | Hph             | [19]       |
| 73 | Anabaenopeptin 862 B                      | 863.5028                        | Leu     | CO | Lys | Ile      | EtHph | MeAsn                    | Phe             | [7]        |
| 74 | Anabaenopeptin SA8                        | 863.5031                        | Ile     | CO | Lys | Ile      | PNL   | Asn                      | Phe             | [18]       |
| 75 | Nodulapeptin 863                          | 864                             | Ile     | CO | Lys | Ile      | Hph   | MeHph                    | AcSer           | [9]        |
| 76 | Anabaenopeptin NZ825                      | 864.4036<br>[M+K] <sup>+</sup>  | Phe     | CO | Lys | Ile      | Hph   | MeGly                    | Hph             | [30]       |
| 77 | Lyngbyaureidamide B                       | 864.4255<br>[M+Na] <sup>+</sup> | Phe     | CO | Lys | Ile      | Hty   | MeAla                    | Phe             | [31]       |
| 78 | Anabaenopeptin NZ841                      | 864.4337<br>[M+Na] <sup>+</sup> | Phe     | CO | Lys | Ile      | Hty   | MeGly                    | Hph             | [30]       |
| 79 | Anabaenopeptin 863                        | 864.4972                        | Lys     | CO | Lys | Ile      | MeHph | MeAsn                    | Phe             | [7]        |
| 80 | Anabaenopeptin SA4                        | 864.4984                        | Lys     | CO | Lys | Ile      | PNV   | Asn                      | Phe             | [18]       |
| 81 | Anabaenopeptin 864                        | 865.3                           | Ile/Leu | CO | Lys | Val      | MeHph | MeAsn                    | Hty             | [19]       |
| 82 | Anabaenopeptin KT864                      | 865.4963                        | Harg    | CO | Lys | Ile      | Hty   | MeAla                    | Phe             | [32]       |
| 83 | Nodulapeptin 865                          | 866                             | Ile     | CO | Lys | Val      | Hph   | MeHty                    | AcSer           | [9]        |
| 84 | Anabaenopeptin T                          | 866.5076                        | Ile     | CO | Lys | Val      | Hty   | MeHty                    | Ile             | [33]       |
| 85 | Anabaenopeptin 866                        | 866.7                           | MeHty   | CO | Lys | Ile/Leu  | Hty   | MeAla                    | MeLeu/<br>Melle | [22]       |
| 86 | Ferintoic acid A                          | 867.4417                        | Trp     | CO | Lys | Val      | Hty   | MeAla                    | Phe             | [34]       |
| 87 | Brunsvicamide A                           | 867.4764<br>[M+Na] <sup>+</sup> | Ile     | CO | Lys | Val      | Leu   | MeTrp                    | Phe             | [28]       |

|     |                                       |                                 |         |    |     |          |       |                   |           |            |
|-----|---------------------------------------|---------------------------------|---------|----|-----|----------|-------|-------------------|-----------|------------|
| 88  | Anabaenopeptin 868                    | 868                             | Ile     | CO | Lys | MetO     | Hty   | MeHt              | Met       | [11]       |
| 89  | Nodulapeptin 867                      | 868                             | Ile     | CO | Lys | Val      | Hph   | MeHty             | Met       | [9]        |
| 90  | Oscillamide B                         | 869.4324                        | Arg     | CO | Lys | Met      | Hty   | MeAla             | Phe       | [35]       |
| 91  | Nodulapeptin 869                      | 870                             | Phe     | CO | Lys | Val      | Leu   | MeHty             | MetO      | [16]       |
| 92  | Anabaenopeptin 869                    | 870.16                          | Tyr     | CO | Lys | Ile/Leu  | Hph   | MeAla             | MeHph     | [19]       |
| 93  | Anabaenopeptin 870                    | 870.7                           | MeHty   | CO | Lys | Ile/Leu  | Hph   | MeAla             | Phe       | [22]       |
| 94  | [Ser <sup>6</sup> ] Nodulapeptin B    | 872                             | Ile     | CO | Lys | MetO     | Hph   | MeHty             | Ser       | [21]       |
| 95  | Anabaenopeptin 871                    | 872.4544                        | Phe     | CO | Lys | Ile      | Hty   | MeAla             | Hty       | [7]        |
| 96  | Anabaenopeptin 872                    | 872.6                           | MeHty   | CO | Lys | Val      | Hty   | MeAla             | Phe       | [22]       |
| 97  | Mozamide B                            | 875.5031                        | Ile     | CO | Lys | Ile      | Leu   | Me-5'-hydroxy Trp | Phe       | [29]       |
| 98  | Anabaenopeptin SA9                    | 876.4062                        | Phe     | CO | Lys | Ile      | ClHTy | Gly               | Hph       | [18]       |
| 99  | Anabaenopeptin 876                    | 877.16                          | Ile/Leu | CO | Lys | Ile/Leu  | EtHph | MeAsn             | Hph       | [19]       |
| 100 | Konbamide                             | 877.3824                        | Leu     | CO | Lys | Ala      | Leu   | MeLeu             | BhTrp     | [36]       |
| 101 | Anabaenopeptin SA10                   | 878.3855                        | Phe     | CO | Lys | Val      | HTy   | Gly               | ClHTyr    | [18]       |
| 102 | Lyngbyaureidamide A                   | 878.4426<br>[M+Na] <sup>+</sup> | Phe     | CO | Lys | Ile      | Hty   | MeAla             | Hph       | [31]       |
| 103 | Anabaenopeptin 877A                   | 878.4864                        | Agr     | CO | Lys | Ile      | Hph   | MeAsn             | Phe       | [7]        |
| 104 | Anabaenopeptin 877B                   | 878.5122                        | Lys     | CO | Lys | Ile      | EtHph | MeAsn             | Phe       | [7]        |
| 105 | Nodulapeptin 879                      | 880                             | Ile     | CO | Lys | Ile      | Hph   | MeHty             | AcSer     | [10]       |
| 106 | Anabaenopeptin NZ857                  | 880.4269<br>[M+Na] <sup>+</sup> | Phe     | CO | Lys | Ile      | Hty   | MeGly             | Hty       | [30]       |
| 107 | Ferintoic acid B                      | 881.4567                        | Trp     | CO | Lys | allo-Ile | Hty   | MeAla             | Phe       | [34]       |
| 108 | Nodulapeptin 881 A                    | 882                             | Ile     | CO | Lys | Met      | Hph   | MeHph             | AcSer     | [10]       |
| 109 | Nodulapeptin 881 B                    | 882                             | Ile     | CO | Lys | Ile      | Hph   | MeHty             | Met       | [10]       |
| 110 | Anabaenopeptin 882                    | 883.4695                        | Phe     | CO | Lys | Ile      | MeHph | MeAsn             | Phe       | [7]        |
| 111 | Nodulapeptin 883 A                    | 884                             | Ile     | CO | Lys | Met      | Hph   | MeHph             | Met       | [10]       |
| 112 | Nodulapeptin 883 B                    | 884                             | Phe     | CO | Lys | Val      | Hph   | MeHph             | AcSer     | [10]       |
| 113 | Nodulapeptin 883 C                    | 884                             | Ile     | CO | Lys | Val      | Hph   | MeHty             | MetO      | [9]        |
| 114 | Anabaenopeptin 884                    | 884                             | Ile     | CO | Lys | Val      | Hph   | MeHty             | AcSer     | [11]       |
| 115 | Nodulapeptin 885                      | 886                             | Phe     | CO | Lys | Val      | Hph   | MeHph             | Met       | [9]        |
| 116 | Anabaenopeptin 886                    | 886.7                           | MeHty   | CO | Lys | Ile/Leu  | Hty   | MeAla             | Phe       | [22]       |
| 117 | Anabaenopeptin SA1                    | 890.4888                        | Arg     | CO | Lys | Ile      | PNV   | Asn               | Phe       | [18]       |
| 118 | Anabaenopeptin SA11                   | 892.4012                        | Phe     | CO | Lys | Ile      | HTy   | Gly               | ClHTyr    | [18]       |
| 119 | Anabaenopeptin 891                    | 892.5023                        | Arg     | CO | Lys | Ile      | MeHph | MeAsn             | Phe       | [7]        |
| 120 | Anabaenopeptin HU892                  | 893.5284                        | Arg     | CO | Lys | Val      | Hph   | MeHty             | Ile       | [37]       |
| 121 | Anabaenopeptin 894                    | 895.6                           | Lys     | CO | Lys | Leu/Ile  | Hty   | MeHty             | Leu/Ile   | This study |
| 122 | Anabaenopeptin 896                    | 897.4858                        | Phe     | CO | Lys | Ile      | EtHph | MeAsn             | Phe       | [7]        |
| 123 | [MeHph <sup>5</sup> ] Nodulapeptin B  | 898                             | Ile     | CO | Lys | MetO     | Hph   | MeHph             | AcSer     | [21]       |
| 124 | Nodulapeptin C                        | 898                             | Ile     | CO | Lys | Met      | Hph   | MeHty             | AcSer     | [21]       |
| 125 | Brunsvicamide C                       | 899.4692<br>[M+Na] <sup>+</sup> | Ile     | CO | Lys | Val      | Leu   | Me-formyl kyn     | Phe       | [28]       |
| 126 | Nodulapeptin 899 / Anabaenopeptin 900 | 900                             | Phe     | CO | Lys | Val      | Hph   | MeHty             | AcSer     | [11, 38]   |
| 127 | Nodulapeptin 899 B                    | 900                             | Ile     | CO | Lys | Val      | Hty   | MeHty             | MetO      | [16]       |
| 128 | [Met <sup>6</sup> ] Nodulapeptin C    | 900                             | Ile     | CO | Lys | Met      | Hph   | MeHty             | Met       | [21]       |
| 129 | Anabaenopeptin 899                    | 900.6                           | Phe     | CO | Lys | Val      | Hty   | MeHty             | Ile       | [39]       |
| 130 | Anabaenopeptin 900                    | 900.7                           | MeHty   | CO | Lys | Ile/Leu  | Hty   | MeAla             | MePhe/Hph | [22]       |
| 131 | Nodulapeptin 901 / Anabenopeptin 902  | 902                             | Phe     | CO | Lys | Val      | Hph   | MeHty             | Met       | [11, 38]   |
| 132 | Paltolide C                           | 904.4044                        | Arg     | CO | Lys | Ala      | Leu   | MeLeu             | BrTrp     | [15]       |
| 133 | Anabaenopeptin 905                    | 906.5196                        | Arg     | CO | Lys | Ile      | EtHph | MeAsn             | Phe       | [7]        |
| 134 | Anabaenopeptin 906                    | 907                             | Arg     | CO | Lys | Ile      | MeHty | MeLeu             | Phe       | [40]       |
| 135 | Anabaenopeptin KB906                  | 907.5417                        | Arg     | CO | Lys | Ile      | Hph   | MeHty             | Ile       | [41]       |

|     |                                           |                                 |     |    |     |         |     |                 |       |          |
|-----|-------------------------------------------|---------------------------------|-----|----|-----|---------|-----|-----------------|-------|----------|
| 136 | Anabaenopeptin G (1)                      | 909                             | Arg | CO | Lys | Ile     | Hty | MeLeu           | Tyr   | [42]     |
| 137 | Anabaenopeptin 908                        | 909.5198                        | Arg | CO | Lys | Val     | Hty | MeHty           | Ile   | [43]     |
| 138 | Nodulapeptin B                            | 914.4438                        | Ile | CO | Lys | Met(O)  | Hph | MeHty           | AcSer | [44]     |
| 139 | Anabaenopeptin MM913                      | 914.5031                        | Tyr | CO | Lys | Ile     | Hph | MeHty           | Ile   | [23]     |
| 140 | Nodulapeptin 915 A                        | 916                             | Ile | CO | Lys | MetO    | Hph | MeHty           | Met   | [10]     |
| 141 | Nodulapeptin 915 B /<br>Anabenopeptin 916 | 916                             | Phe | CO | Lys | Val     | Hty | MeHty           | AcSer | [10, 11] |
| 142 | Anabaenopeptin 915                        | 916.4828                        | Tyr | CO | Lys | Val     | Hty | MeHty           | Ile   | [43]     |
| 143 | Nodulapeptin 917 /<br>Anabaenopeptin 918  | 918                             | Phe | CO | Lys | Val     | Hph | MeHty           | MetO  | [11, 38] |
| 144 | Anabaenopeptin KB899                      | 922.4693<br>[M+Na] <sup>+</sup> | Tyr | CO | Lys | Val     | Hph | MeHty           | Ile   | [41]     |
| 145 | Anabaenopeptin H                          | 923.5352                        | Arg | CO | Lys | Ile     | Hty | MeHty           | Ile   | [45]     |
| 146 | Keramamide L                              | 927.4541                        | Phe | CO | Lys | Leu     | Leu | MeCTrp          | Phe   | [46]     |
| 147 | Oscillamide H                             | 930                             | Tyr | CO | Lys | Melle   | Ile | MeHty           | Ile   | [16]     |
| 148 | Nodulapeptin A                            | 930.4297                        | Ile | CO | Lys | Met(O2) | Hph | MeHty           | AcSer | [44]     |
| 149 | Anabaenopeptin G (2)                      | 930.4974                        | Tyr | CO | Lys | Ile     | Hty | MeHty           | Ile   | [45]     |
| 150 | Nodulapeptin 931                          | 932                             | Ile | CO | Lys | MetO    | Hph | MeHty           | MetO  | [10]     |
| 151 | Nodulapeptin 933                          | 934                             | Phe | CO | Lys | Val     | Hty | MeHty           | MetO  | [10]     |
| 152 | (-)-Psymbamide A                          | 937.4181                        | Ile | CO | Lys | Leu     | Leu | Me-5'-<br>BrTrp | Phe   | [47]     |
| 153 | Keramamide A                              | 943.4485                        | Phe | CO | Lys | Leu     | Leu | MeCht           | Phe   | [48]     |
| 154 | Oscillamide C                             | 957.5198                        | Arg | CO | Lys | Ile     | Hty | MeHty           | Phe   | [35]     |
| 155 | Pompanopeptin B                           | 958.529                         | Ile | CO | Lys | Val     | Hty | Me Ahpha        | Hty   | [49]     |

Ala = alanine, AcSer = acetyl-serine, Arg = arginine, Asn = asparagine, Bh-Trp = 2-bromo-5-hydroxy-tryptophan, Br-Trp = bromo-tryptophan, Cl-Htyr = chloro-homotyrosine, EtHph = ethyl-homophenylalanine, Gly = glycine, Harg = homoarginine, Hphe = homophenylalanine, Hphe/MePhe = homophenylalanine/methyl-phenylalanine (isobaric compounds), Htyr = homotyrosine, Leu/Ile = leucine/isoleucine (isobaric compounds), Lys = lysine, Met = methionine, MetO = methionine sulfoxide, Met(O)2 = methionine sulfone (S-dioxide), Me-5'-BrTrp = methyl-5'-bromo-tryptophan, Me-5'-hydroxyTrp = methyl-5'-hydroxy-tryptophan, MeAhpha = N-methyl -2-amino-6-(hydroxyl phenyl) hexanoic acid, MeAla = methyl-alanine, MeAsn = methyl-asparagine, MeCht = 6-chloro-5-hydroxy-N-methyl-tryptophan, MeCTrp = 6-chloro-N-methyl-tryptophan, Me-formyl kyn = methyl-formyl kynurenine, MeGly = methyl-glycine, MeHph = methyl-homophenylalanine, MeHtyr = methyl-homotyrosine, MeLeu/Melle = methyl-leucine/methyl-isoleucine (isobaric compounds), MeTrp = methyl-tryptophan, OMeArg = arginine methyl ester, OMeGlu = glutamic acid methyl ester, OHTrp = hydroxyl-tryptophan, Phe = phenylalanine, PNV = 5-Phenylnorvaline, PNL = 6-Phenylnorleucine, Ser = serine, Trp = tryptophan, Tyr = Tyrosine, Val = valine.

**Table S2.** List of the cyanobacterial strains from Greek freshwaters, examined for their ability to produce APs.

| Cyanobacterial strain                                 | Growth medium       | Maximum growth (day) | Produced APs                    |
|-------------------------------------------------------|---------------------|----------------------|---------------------------------|
| <i>Anabaena oscillaroides</i> TAU-MAC 0199            | BG11 <sub>0</sub> * | 32                   | -                               |
| <i>Calothrix epiphytica</i> TAU-MAC 0399              | BG11 <sub>0</sub>   | 35                   | -                               |
| <i>Chlorogloeopsis fritschii</i> TAU-MAC 0599         | BG11 <sub>0</sub>   | 30                   | -                               |
| <i>Desmonostoc muscorum</i> TAU-MAC 0699              | BG11 <sub>0</sub>   | 29                   | -                               |
| <i>Jaaginema</i> sp. TAU-MAC 0110                     | BG11                | 27                   | -                               |
| <i>Jaaginema</i> sp. TAU-MAC 0210                     | BG11                | 27                   | -                               |
| <i>Jaaginema</i> sp. TAU-MAC 2210                     | BG11                | 26                   | -                               |
| <i>Limnothrix redekei</i> TAU-MAC 0310                | BG11                | 21                   | -                               |
| <i>Microcystis</i> sp. TAU-MAC 0710                   | BG11                | 27                   | -                               |
| <i>Microcystis</i> sp. TAU-MAC 1710                   | BG11                | 28                   | -                               |
| <i>Microcystis</i> sp. TAU-MAC 1910                   | BG11                | 26                   | -                               |
| <i>Microcystis</i> sp. TAU-MAC 2010                   | BG11                | 26                   | -                               |
| <i>Microcystis</i> sp. TAU-MAC 2110                   | BG11                | 25                   | -                               |
| <i>Microcystis</i> sp. TAU-MAC 2310                   | BG11                | 25                   | -                               |
| <i>Microcystis</i> sp. TAU-MAC 2410                   | BG11                | 24                   | -                               |
| <i>Microcystis aeruginosa</i> TAU-MAC 0610            | BG11                | 23                   | -                               |
| <i>Microcystis flos-aquae</i> TAU-MAC 0410            | BG11                | 21                   | -                               |
| <i>Microcystis flos-aquae</i> TAU-MAC 1410            | BG11                | 25                   | -                               |
| <i>Microcystis flos-aquae</i> TAU-MAC 1510            | BG11                | 24                   | -                               |
| <i>Microcystis flos-aquae</i> TAU-MAC 1610            | BG11                | 26                   | -                               |
| <i>Microcystis ichthyoblabe</i> TAU-MAC 0510          | BG11                | 29                   | Anabaenopeptin A, Oscillamide Y |
| <i>Microcystis viridis</i> TAU-MAC 1810               | BG11                | 23                   | -                               |
| <i>Nodosilinea</i> sp. TAU-MAC 0104                   | BG11                | 29                   | -                               |
| <i>Nostoc</i> sp. TAU-MAC 0799                        | BG11 <sub>0</sub>   | 28                   | -                               |
| <i>Nostoc</i> sp. TAU-MAC 0899                        | BG11 <sub>0</sub>   | 27                   | -                               |
| <i>Nostoc elgonense</i> TAU-MAC 0299                  | BG11 <sub>0</sub>   | 24                   | -                               |
| <i>Nostoc oryzae</i> TAU-MAC 2610                     | BG11 <sub>0</sub>   | 27                   | -                               |
| <i>Nostoc oryzae</i> TAU-MAC 2710                     | BG11 <sub>0</sub>   | 27                   | -                               |
| <i>Synechococcus</i> sp. TAU-MAC 0499                 | BG11                | 29                   | -                               |
| <i>Synechococcus</i> cf. <i>nidulans</i> TAU-MAC 3010 | BG11                | 28                   | -                               |

\* BG11<sub>0</sub> is BG11 without nitrogen.

| Lake         | Sampling date | <i>Microcystis</i> sp. | <i>Dolichospermum</i> sp. | AP A | AP B | AP F | Osc y | AP 820 | AP 842 | AP 870 | AP 872 | AP 886 | AP KB906 | AP 837 | AP 851 | AP 894 | Number of APs |
|--------------|---------------|------------------------|---------------------------|------|------|------|-------|--------|--------|--------|--------|--------|----------|--------|--------|--------|---------------|
| Amvrakia     | 10 Aug 1999   |                        |                           |      |      |      |       |        |        |        |        |        |          |        |        |        | 4             |
| Amvrakia     | 19 Aug 1999   |                        |                           |      |      |      |       |        |        |        |        |        |          |        |        |        | 1             |
| Amvrakia     | 19 Aug 1999   |                        |                           |      |      |      |       |        |        |        |        |        |          |        |        |        | 3             |
| Kastoria     | 5 Oct 1995    |                        |                           |      |      |      |       |        |        |        |        |        |          |        |        |        | 6             |
| Kastoria     | 5 Oct 1995    |                        |                           |      |      |      |       |        |        |        |        |        |          |        |        |        | 8             |
| Kastoria     | 3 July 2000   |                        |                           |      |      |      |       |        |        |        |        |        |          |        |        |        | 3             |
| Kastoria     | 20 Sep 2000   |                        |                           |      |      |      |       |        |        |        |        |        |          |        |        |        | 4             |
| Kastoria     | 18 Sep 2014   |                        |                           |      |      |      |       |        |        |        |        |        |          |        |        |        | 4             |
| Kastoria     | 6 Oct 2015    |                        |                           |      |      |      |       |        |        |        |        |        |          |        |        |        | 3             |
| Pamvotida    | 22 July 1999  |                        |                           |      |      |      |       |        |        |        |        |        |          |        |        |        | 6             |
| Pamvotida    | 18 Aug 1999   |                        |                           |      |      |      |       |        |        |        |        |        |          |        |        |        | 3             |
| Pamvotida    | 5 Aug 2000    |                        |                           |      |      |      |       |        |        |        |        |        |          |        |        |        | 1             |
| Pamvotida    | 17 Aug 2000   |                        |                           |      |      |      |       |        |        |        |        |        |          |        |        |        | 3             |
| Pamvotida    | 18 Aug 2000   |                        |                           |      |      |      |       |        |        |        |        |        |          |        |        |        | 6             |
| Pamvotida    | 18 Aug 2000   |                        |                           |      |      |      |       |        |        |        |        |        |          |        |        |        | 6             |
| Kerkini      | 3 Aug 1999    |                        |                           |      |      |      |       |        |        |        |        |        |          |        |        |        | 8             |
| Kerkini      | 26 Aug 1999   |                        |                           |      |      |      |       |        |        |        |        |        |          |        |        |        | 6             |
| Zazari       | 5 Aug 1999    |                        |                           |      |      |      |       |        |        |        |        |        |          |        |        |        | 8             |
| Mikri Prespa | 5 Aug 1999    |                        |                           |      |      |      |       |        |        |        |        |        |          |        |        |        | 6             |
| Mikri Prespa | 4 Nov 2014    |                        |                           |      |      |      |       |        |        |        |        |        |          |        |        |        | 6             |
| Vistonida    | 2 Aug 1999    |                        |                           |      |      |      |       |        |        |        |        |        |          |        |        |        | 6             |
| Karla        | 1 July 2015   |                        |                           |      |      |      |       |        |        |        |        |        |          |        |        |        | 0             |
| Marathonas   | 26 Oct 2010   |                        |                           |      |      |      |       |        |        |        |        |        |          |        |        |        | 0             |
| % Presence   |               |                        |                           | 35   | 65   | 87   | 87    | 4      | 26     | 13     | 43     | 57     | 4        | 4      | 4      | 9      |               |

**Figure S1.** Anabaenopeptins presence in cyanobacterial blooms of Greek freshwaters and the dominant species.

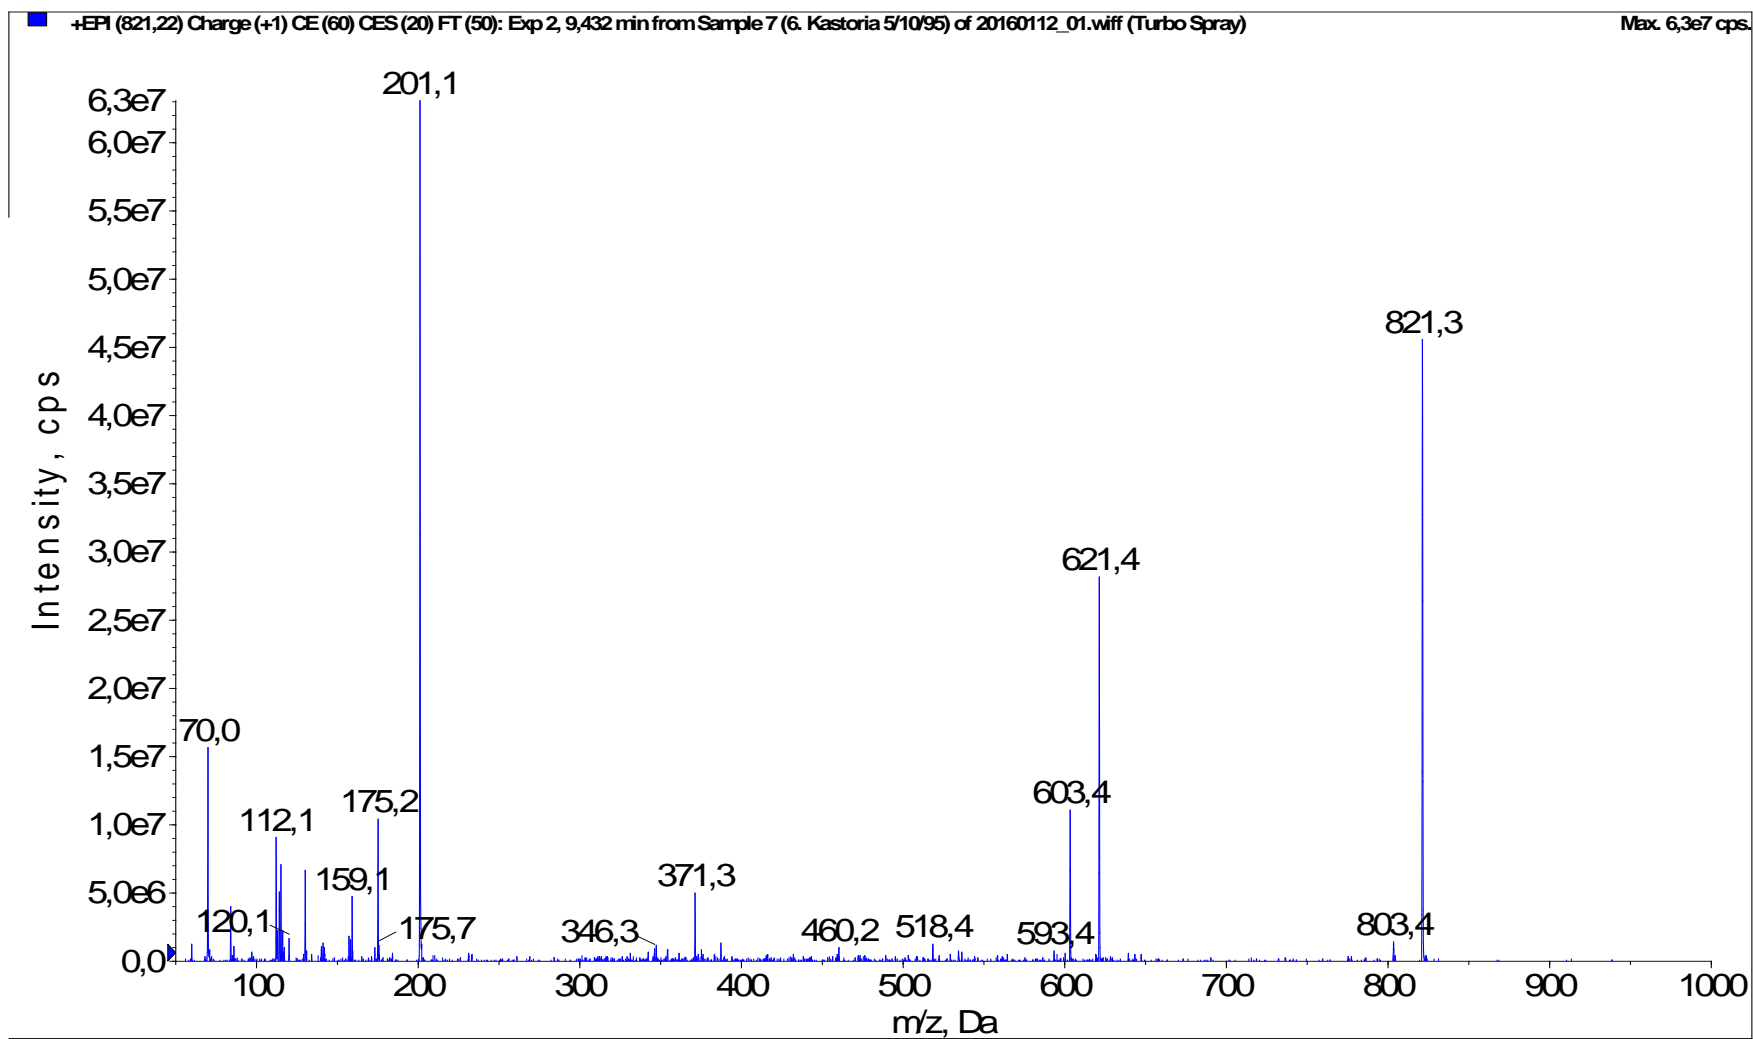

Figure S2. Fragmentation mass spectrum of Anabaenopeptin 820 with precursor ion at  $m/z$  821  $[M + H]^+$ .

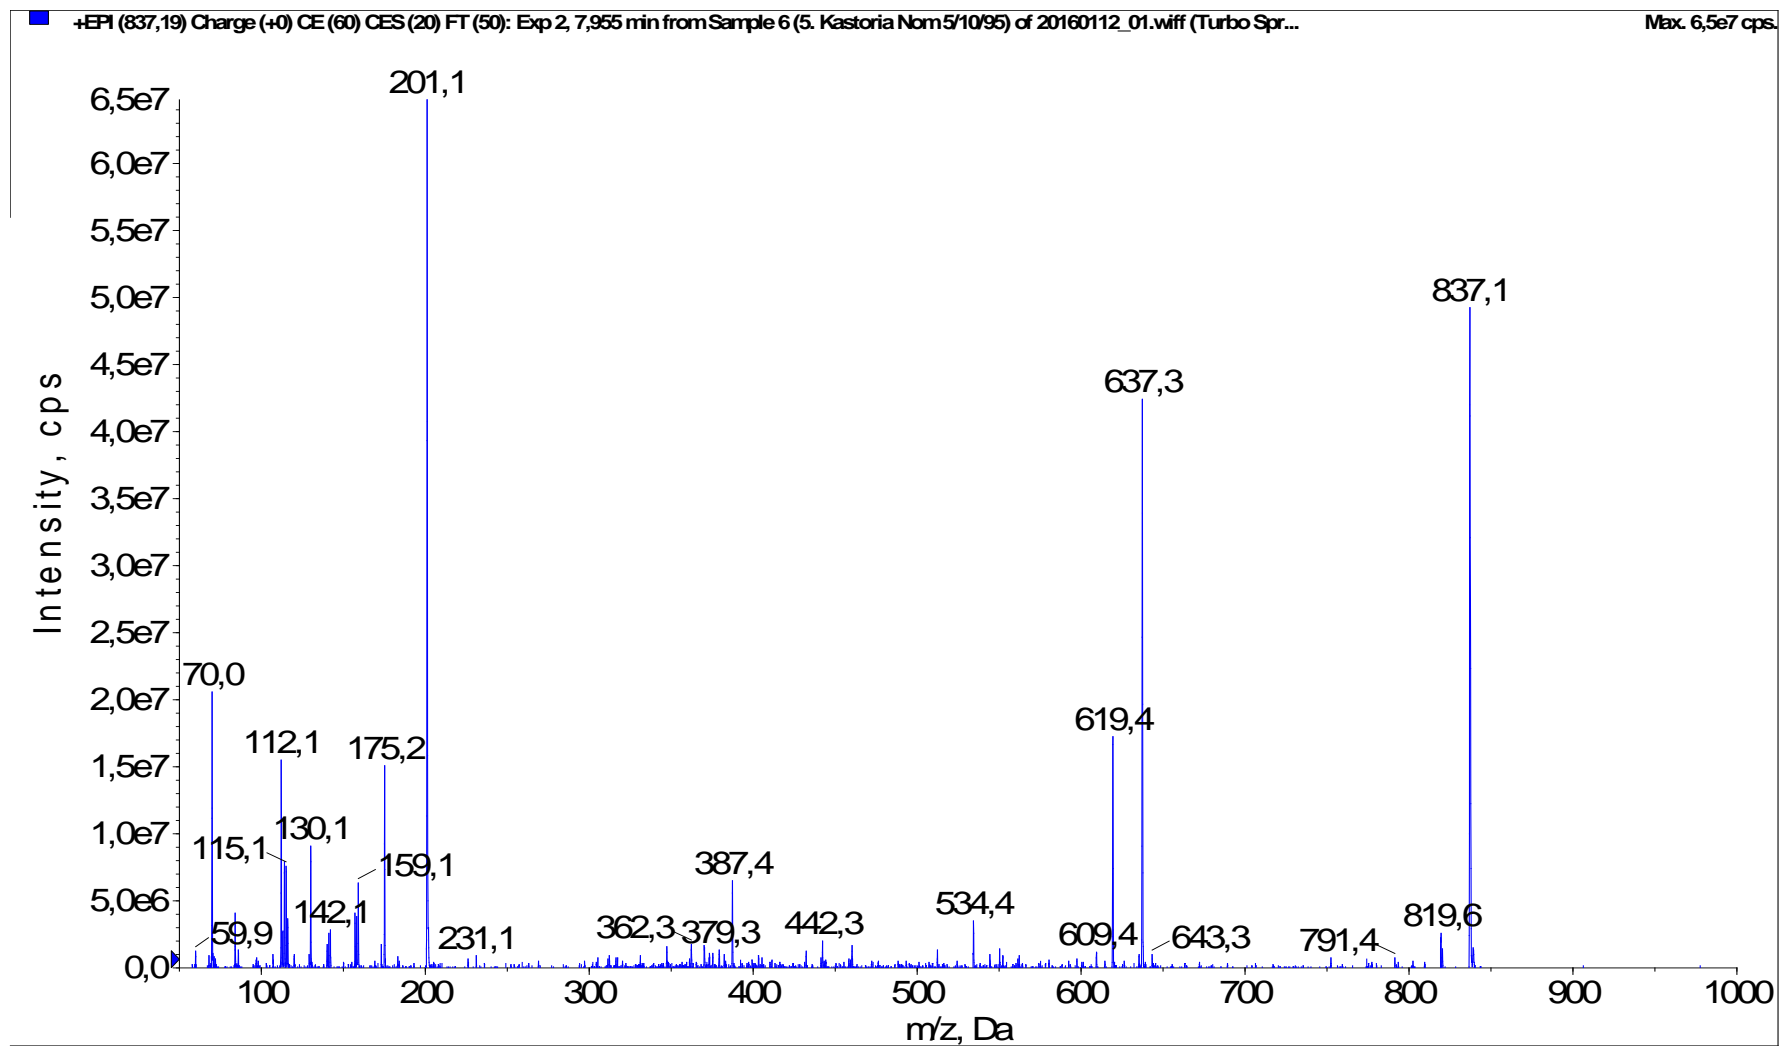

Figure S3. Fragmentation mass spectrum of Anabaenopeptin B with precursor ion at  $m/z$  837  $[M + H]^+$ .



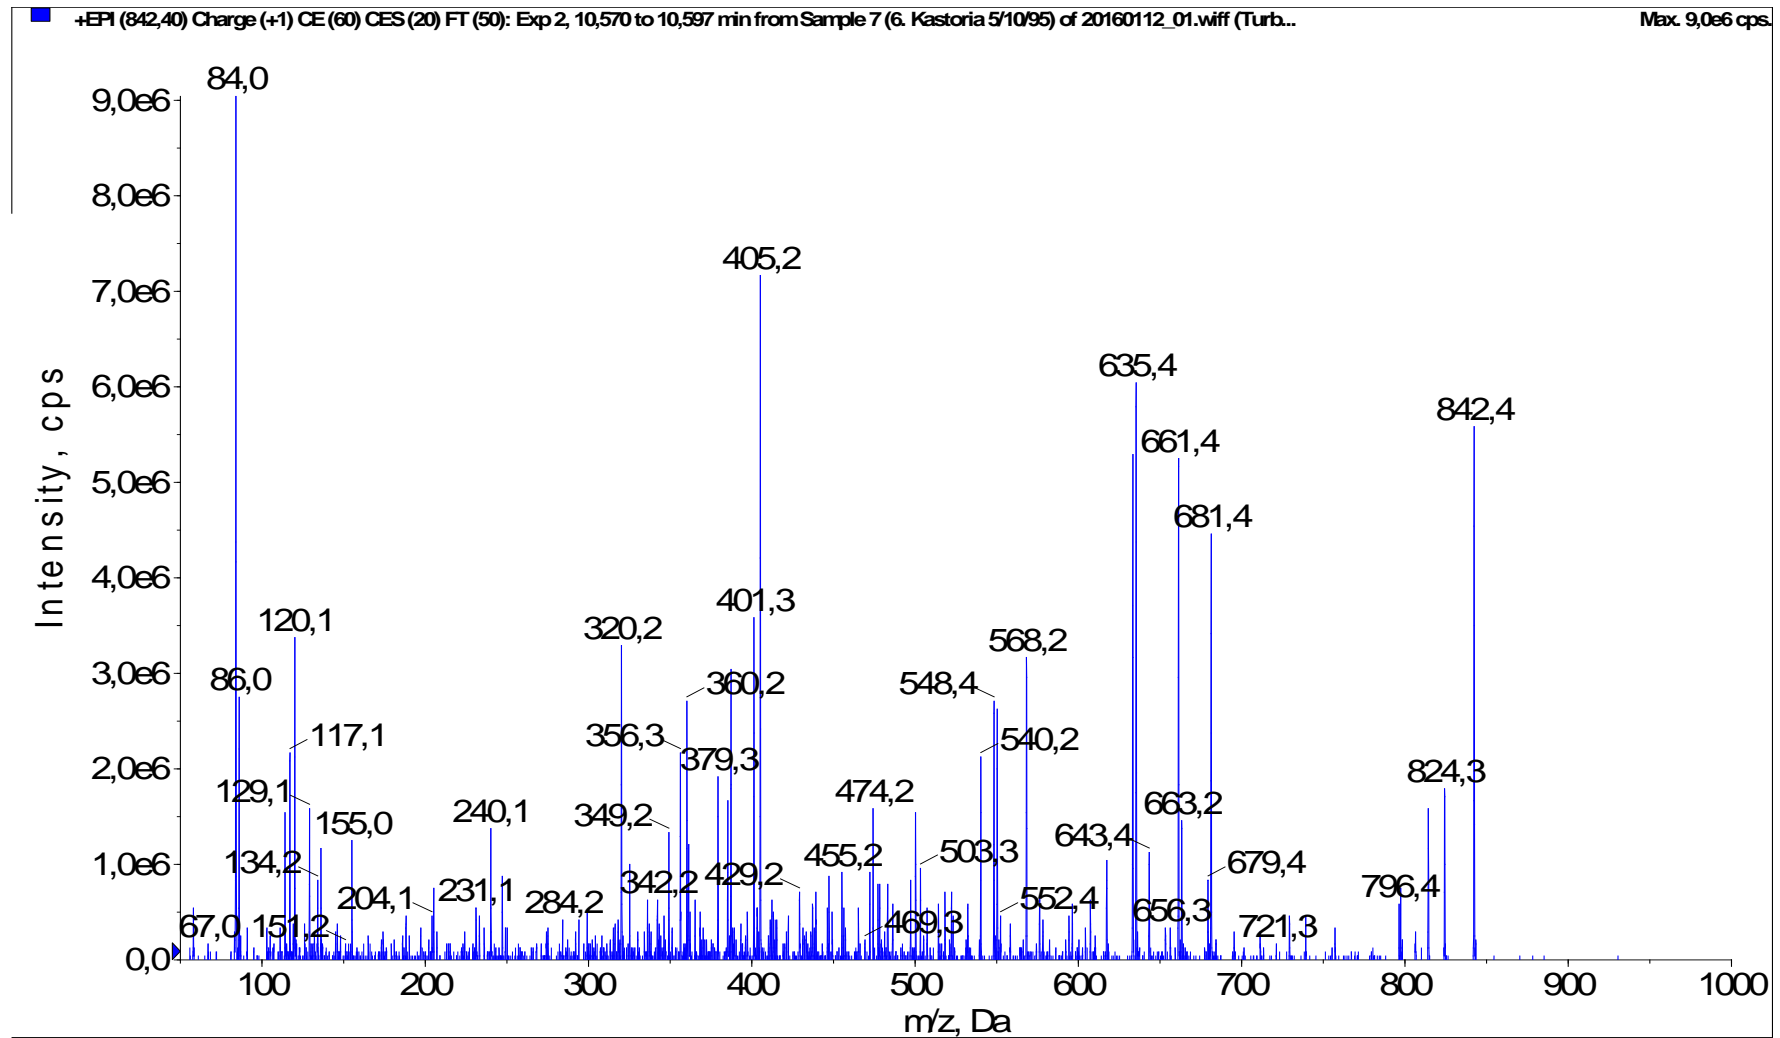

Figure S4. Fragmentation mass spectrum of Anabaenopeptin 842 with precursor ion at  $m/z$  842  $[M + H]^+$ .

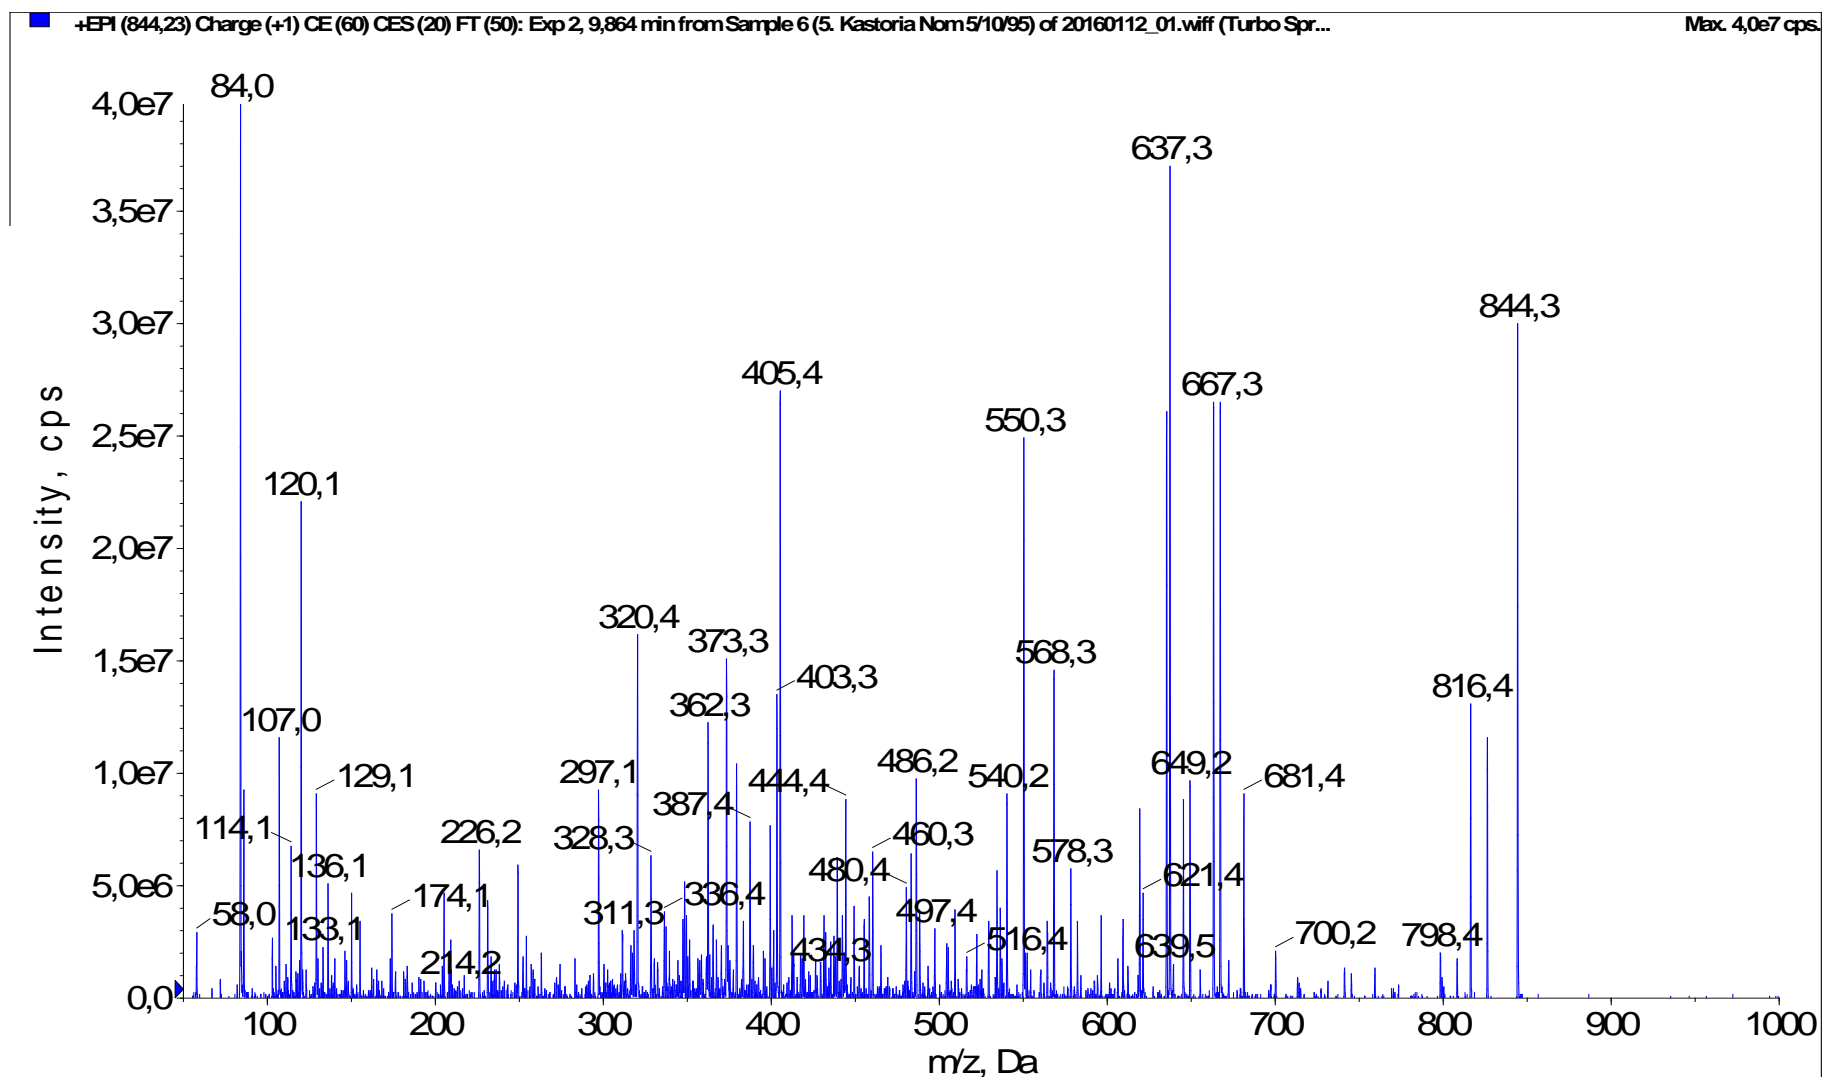

Figure S5. Fragmentation mass spectrum of Anabaenopeptin A with precursor ion at  $m/z$  844  $[M + H]^+$ .

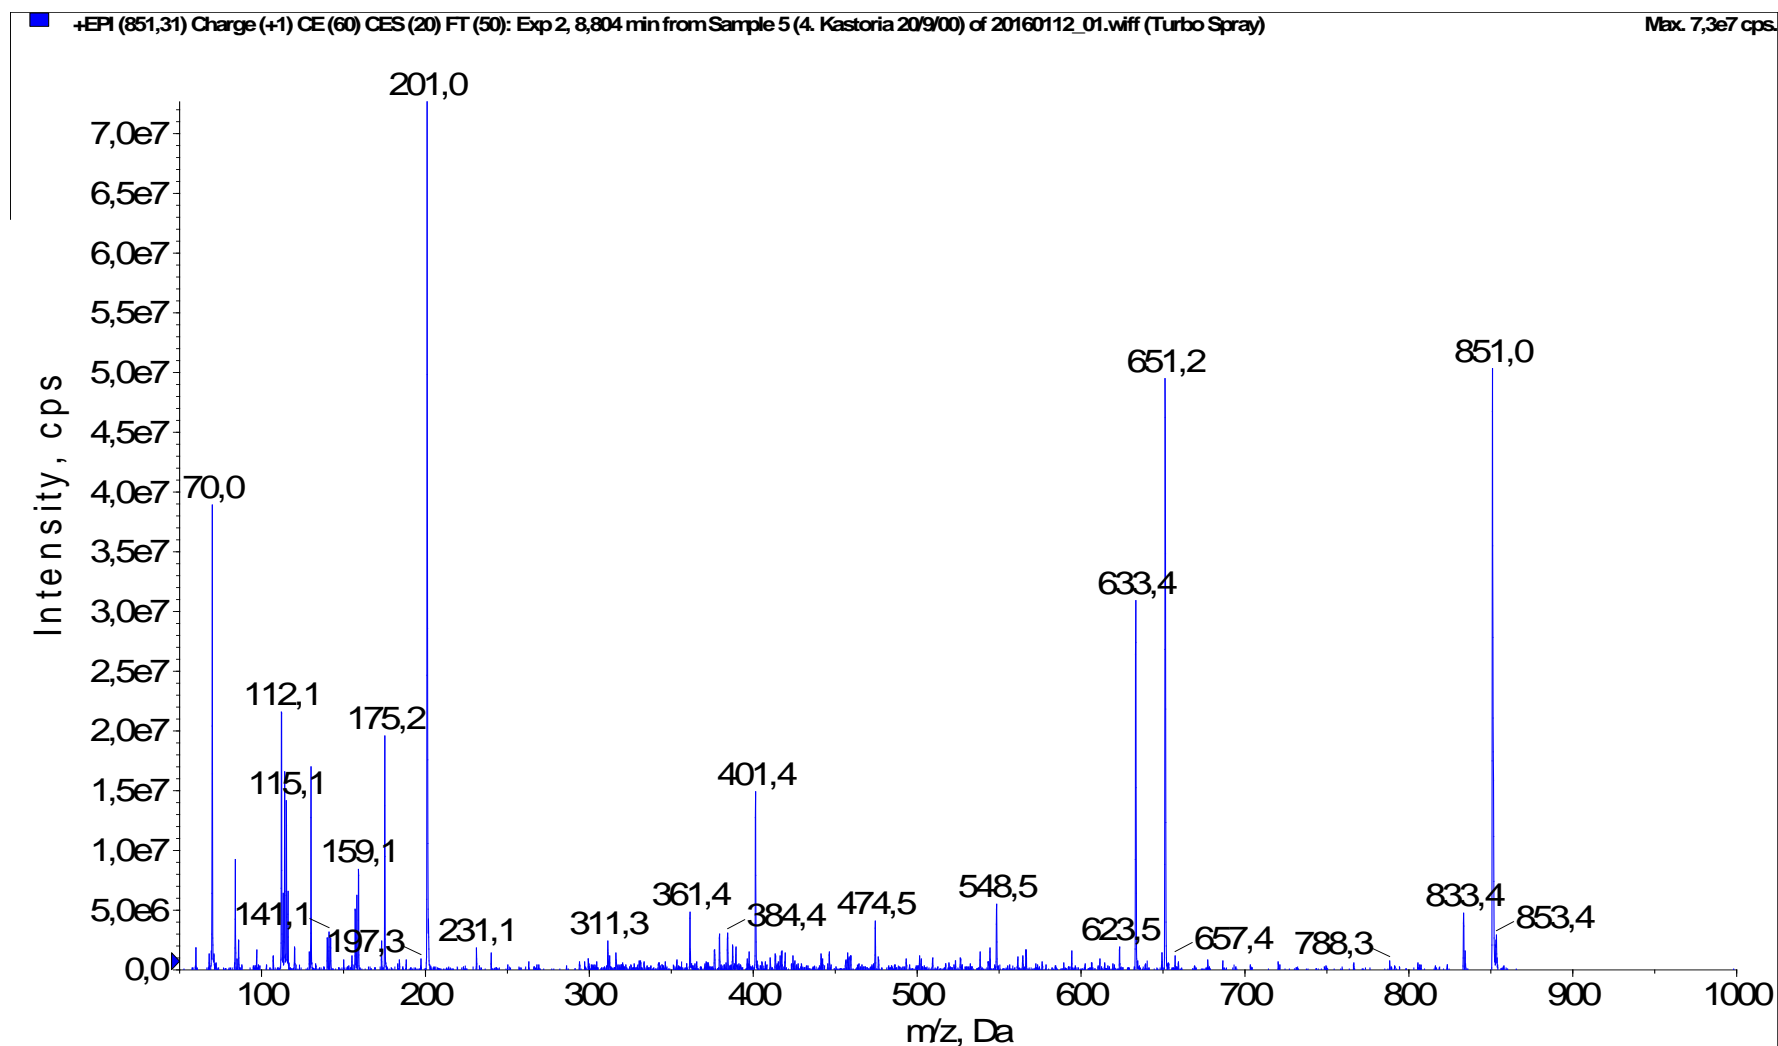

Figure S6. Fragmentation mass spectrum of Anabaenopeptin F with precursor ion at  $m/z$  851  $[M + H]^+$ .

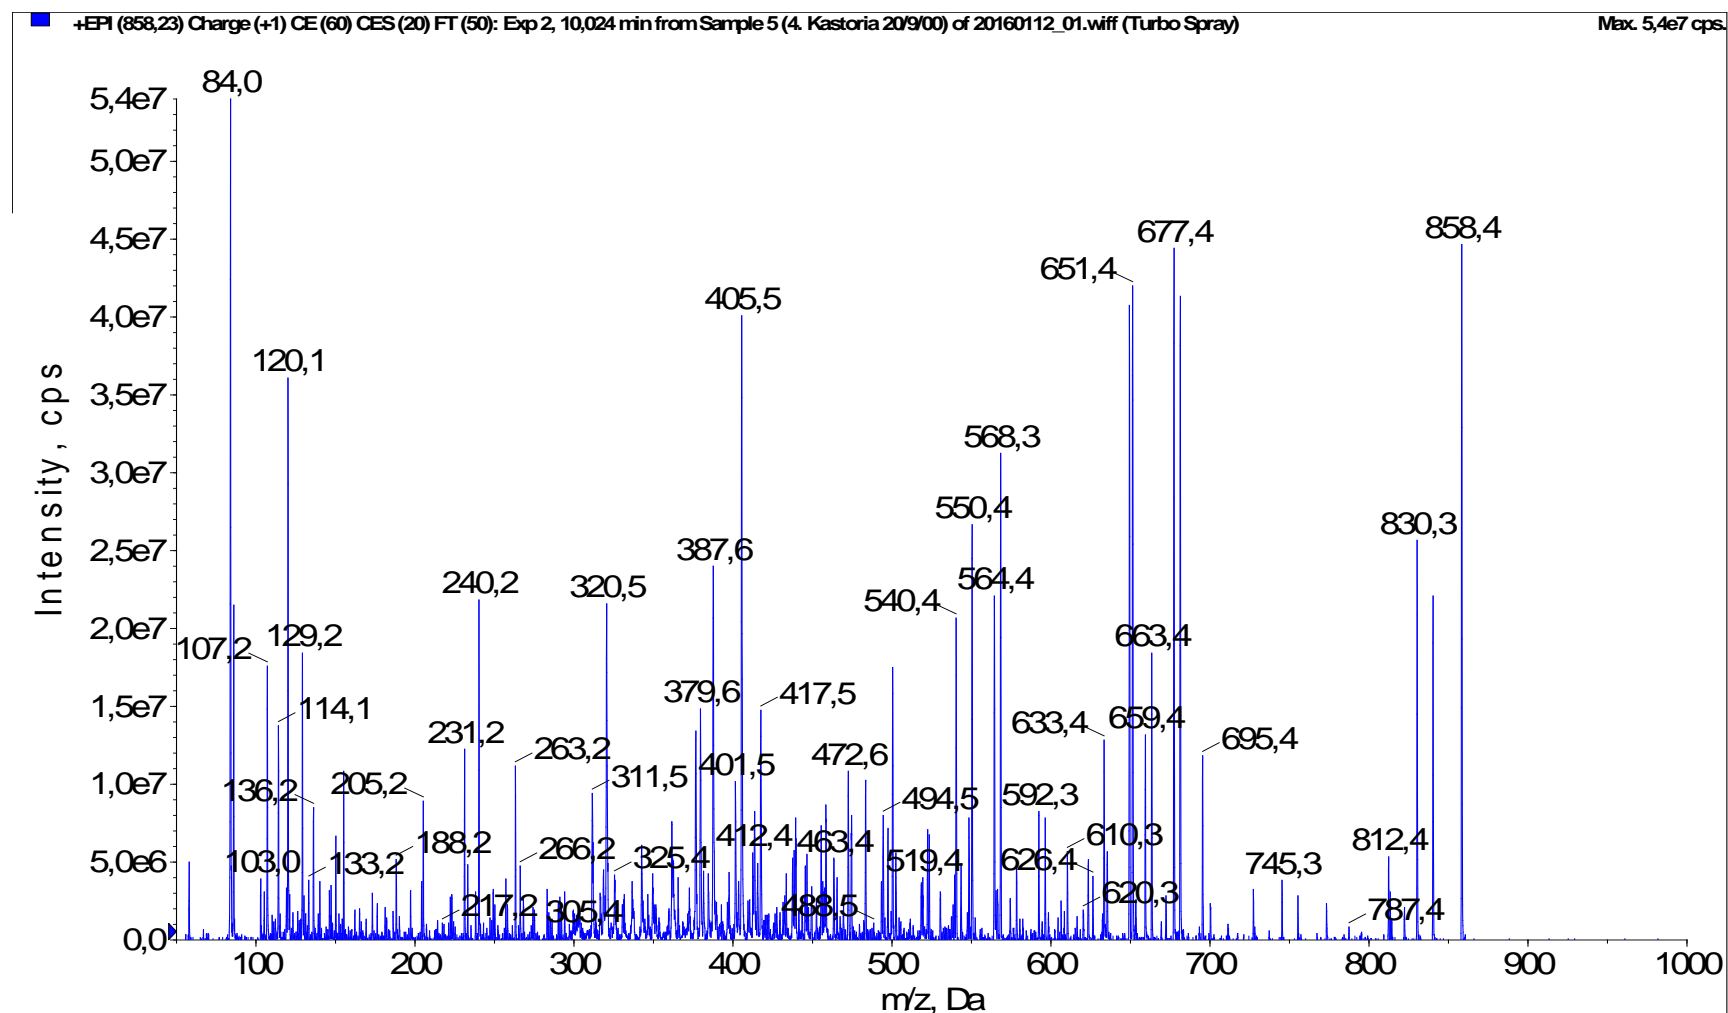

Figure S7. Fragmentation mass spectrum of Oscillamide Y with precursor ion at  $m/z$  858  $[M + H]^+$ .

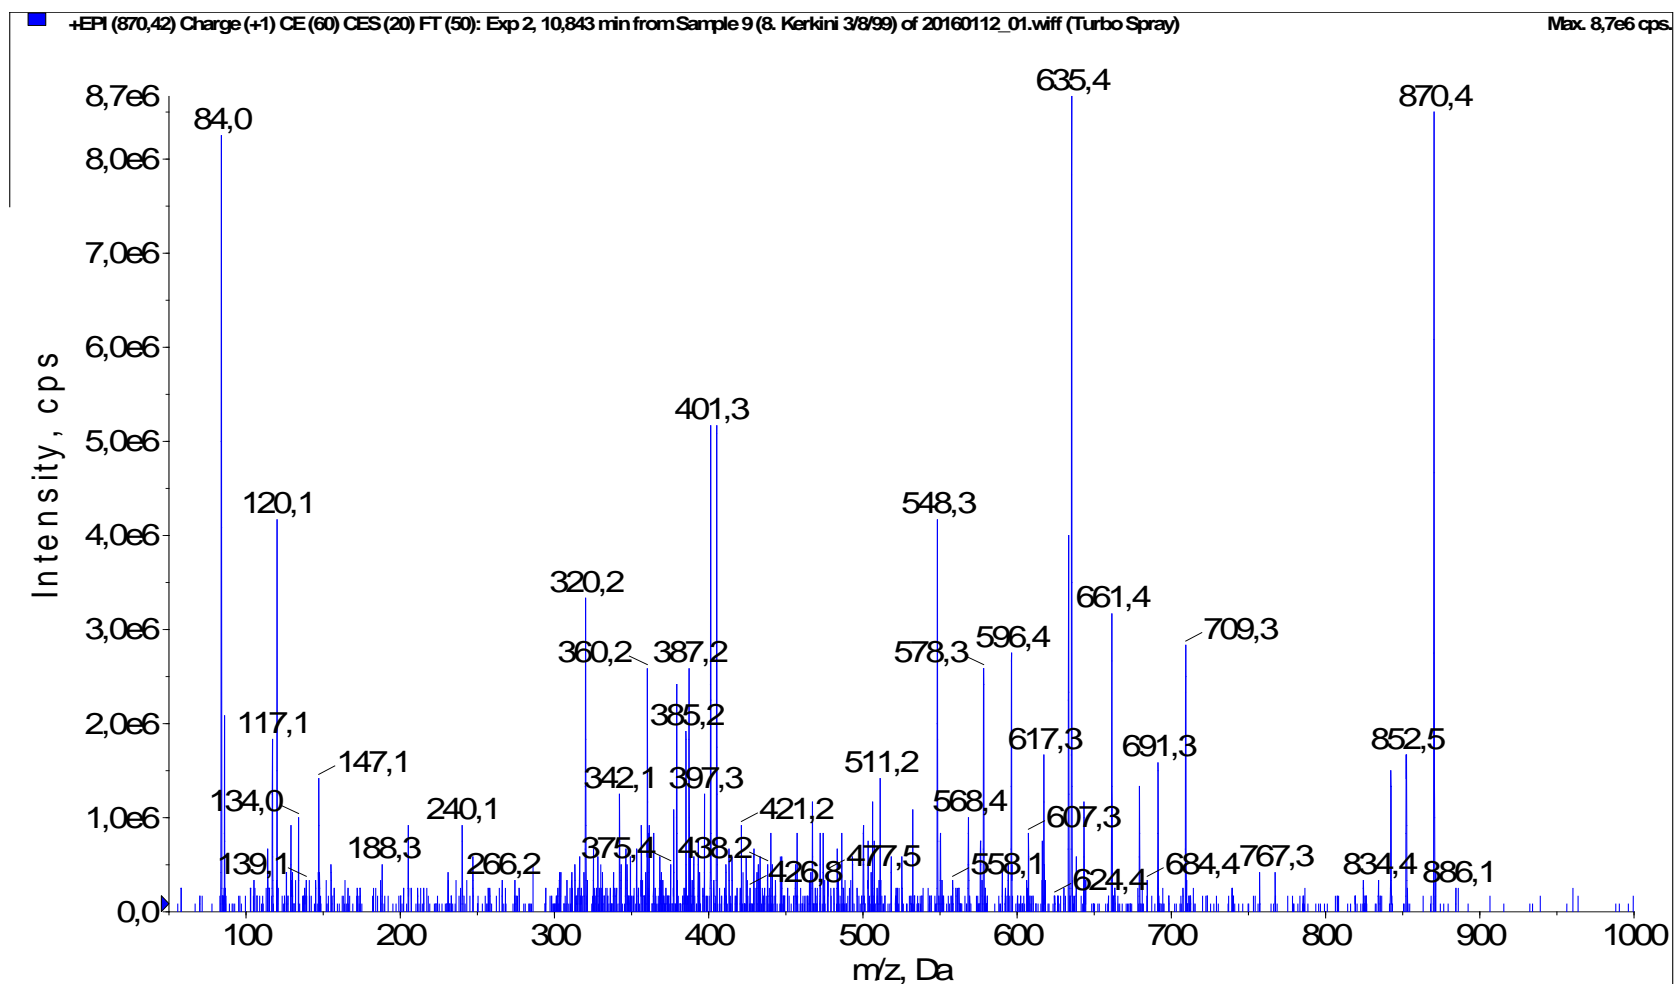

Figure S8. Fragmentation mass spectrum of Anabaenopeptin 870 with precursor ion at  $m/z$  870  $[M + H]^+$ .

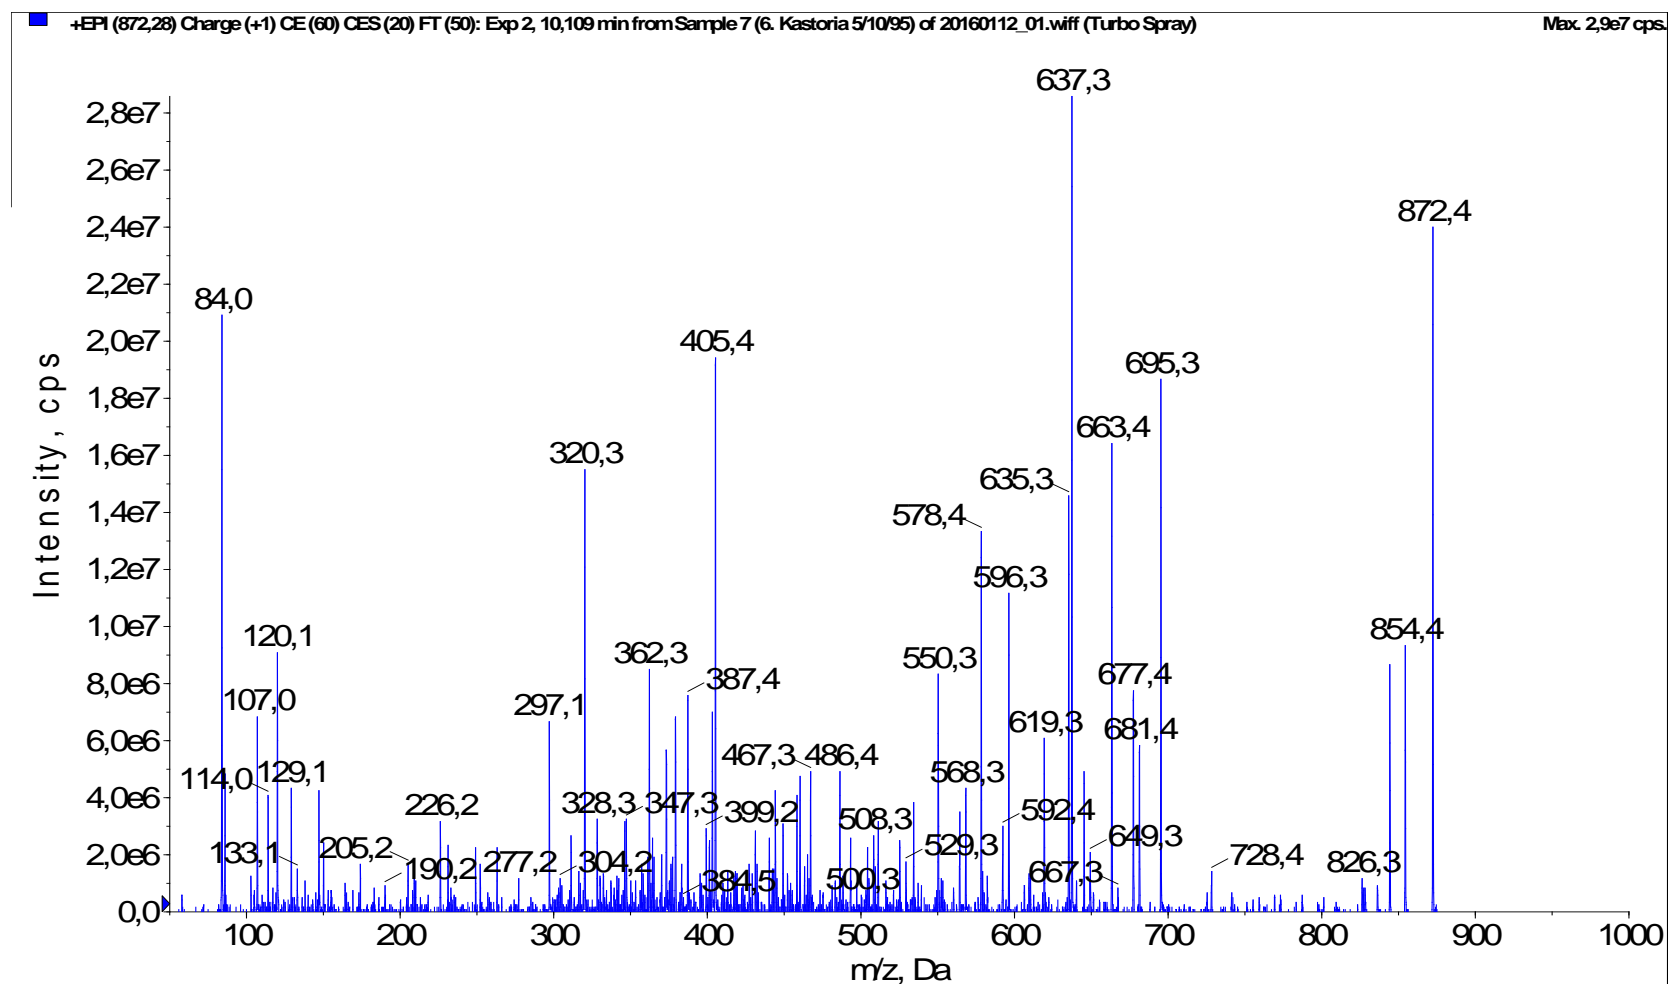

Figure S9. Fragmentation mass spectrum of Anabaenopeptin 872 with precursor ion at  $m/z$  872  $[M + H]^+$ .

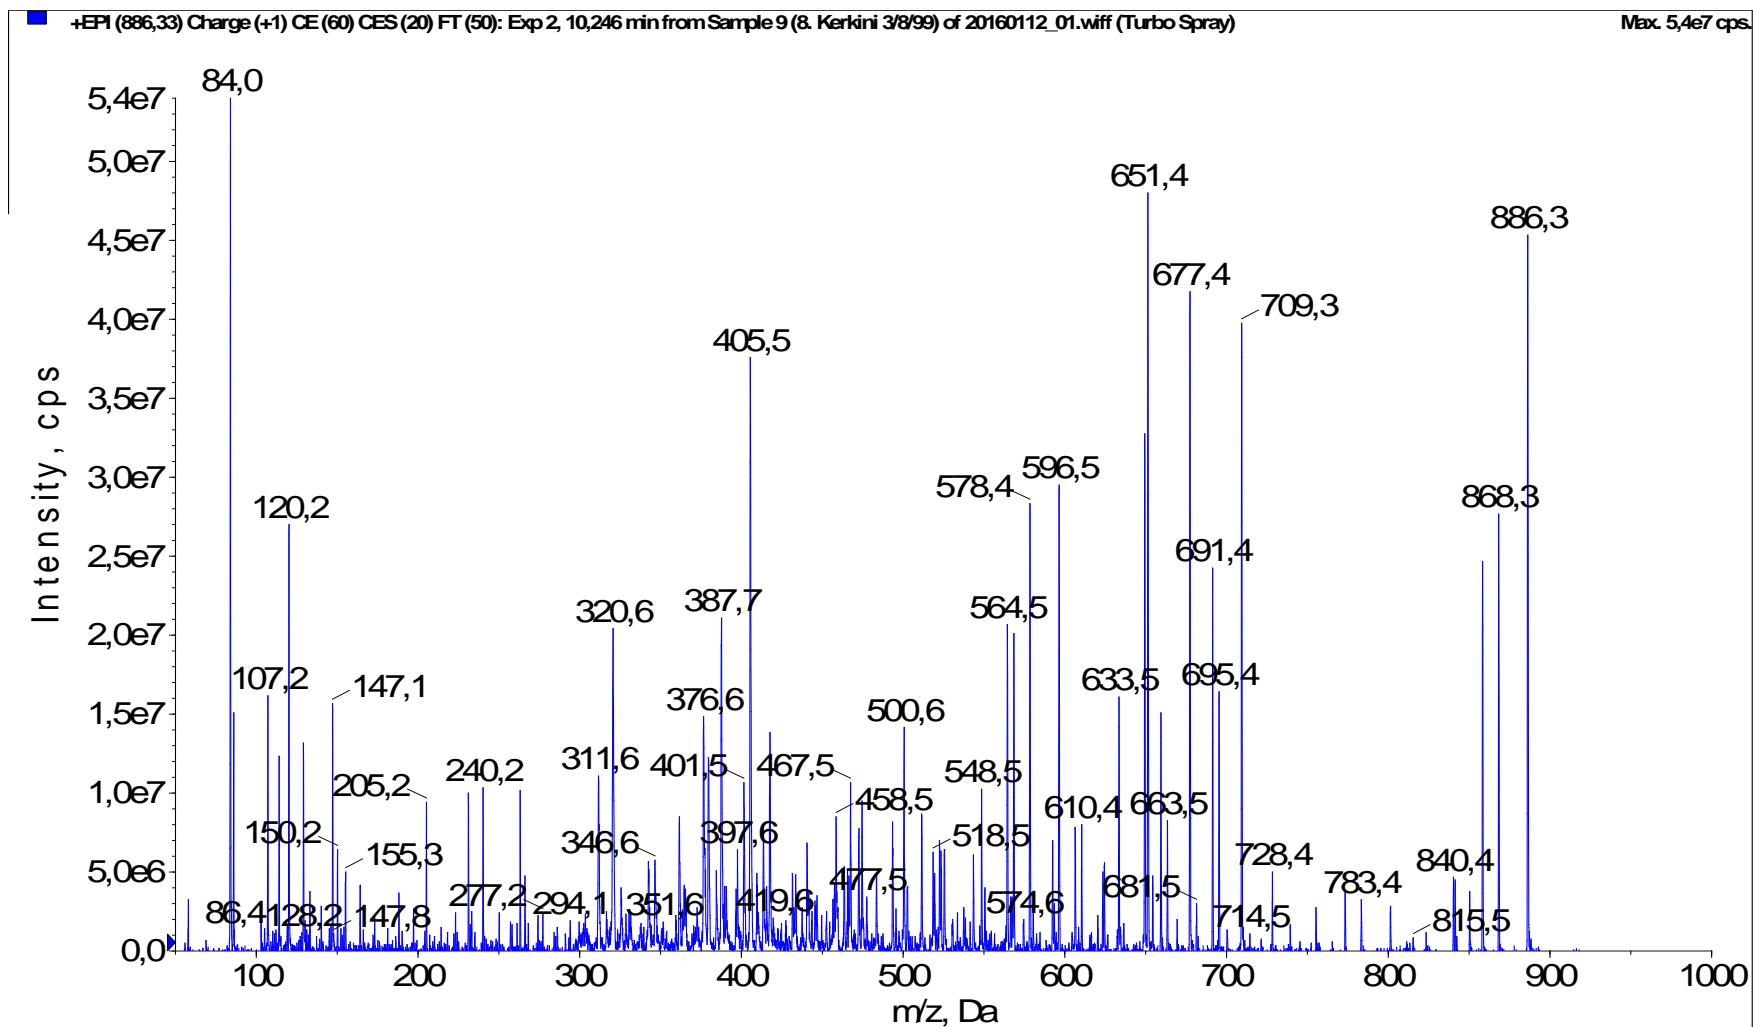

Figure S10. Fragmentation mass spectrum of Anabaenopeptin 886 with precursor ion at  $m/z$  886  $[M + H]^+$ .

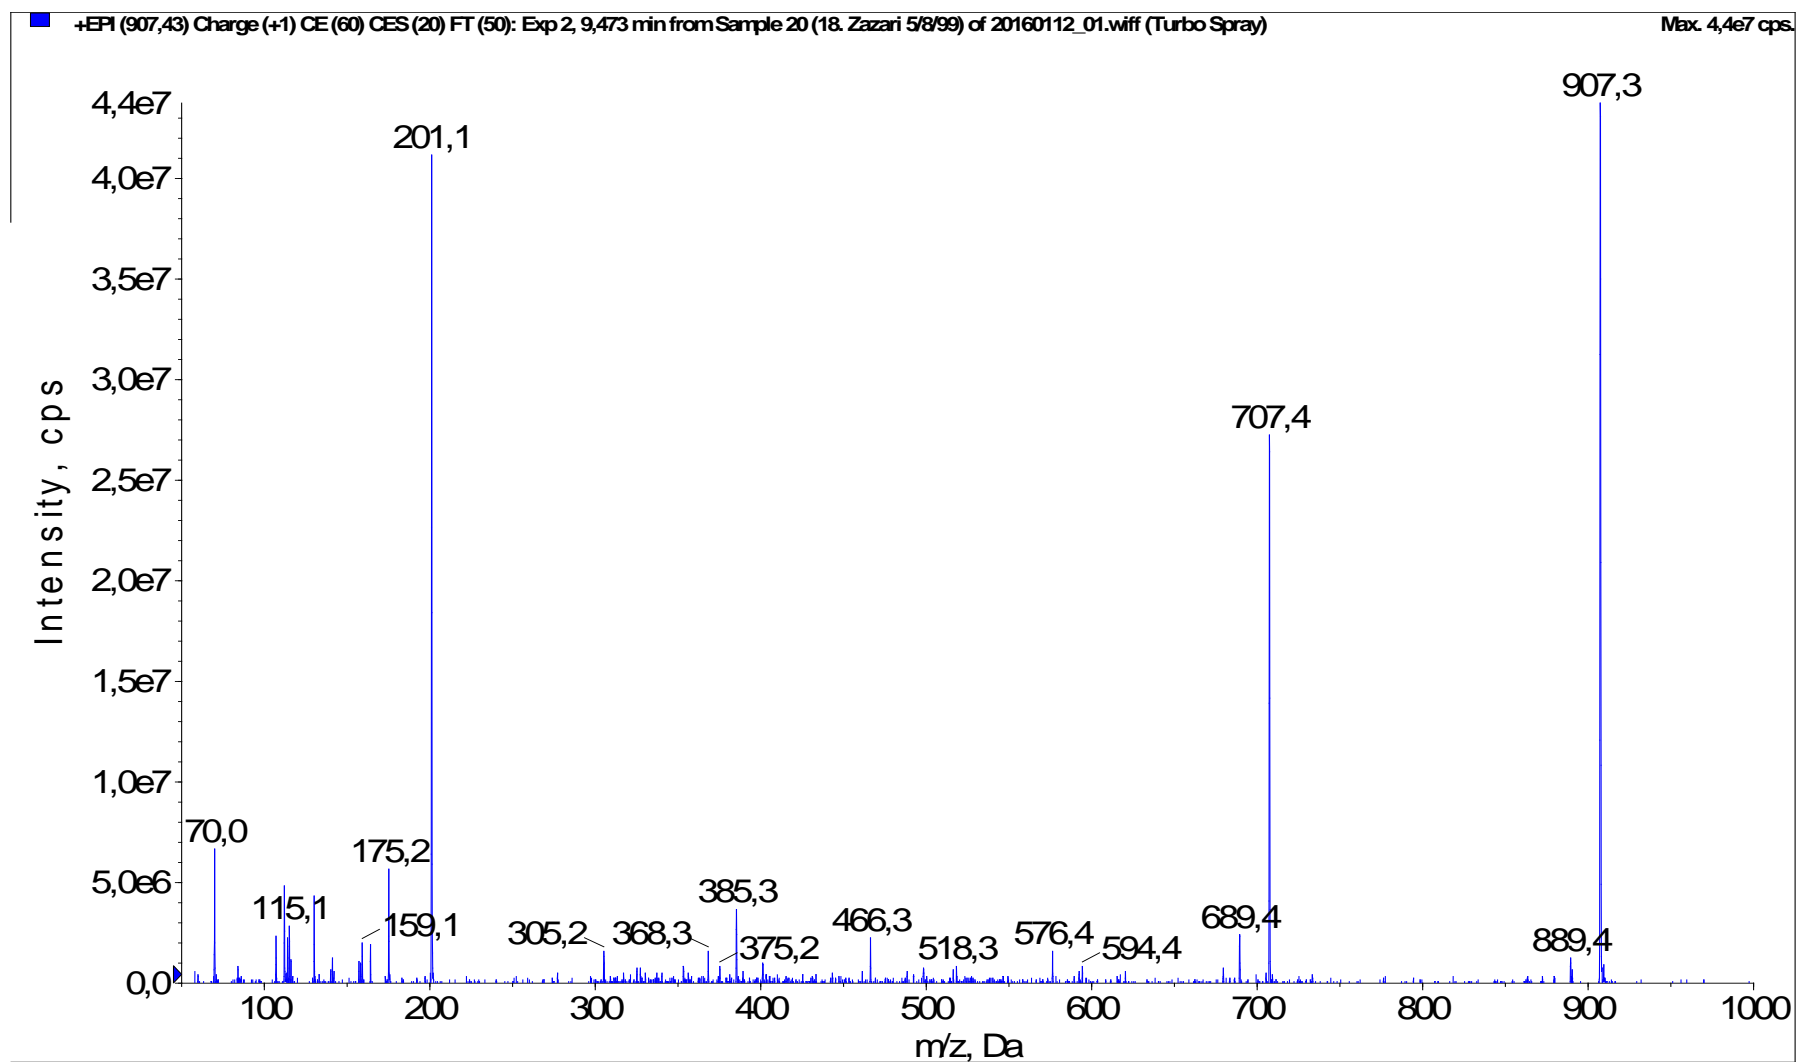

Figure S11. Fragmentation mass spectrum of Anabaenopeptin KB 906 with precursor ion at  $m/z$  907  $[M + H]^+$ .



## References

1. Harms, H., et al., *Discovery of anabaenopeptin 679 from freshwater algal bloom material: Insights into the structure–activity relationship of anabaenopeptin protease inhibitors*. Bioorganic & Medicinal Chemistry Letters, 2016. **26**(20): p. 4960-4965.
2. Roy-Lachapelle, A., et al., *A Data-Independent Methodology for the Structural Characterization of Microcystins and Anabaenopeptins Leading to the Identification of Four New Congeners*. Toxins, 2019. **11**(11): p. 619.
3. Murakami, M., et al., *New anabaenopeptins, carboxypeptidase-A inhibitors from the cyanobacterium Aphanizomenon flos-aquae*. Journal of Natural Products, 2000. **63**(9): p. 1280-1282.
4. Shishido, T.K., et al., *Simultaneous Production of Anabaenopeptins and Namalides by the Cyanobacterium Nostoc sp. CENA543*. ACS Chemical Biology, 2017. **12**(11): p. 2746-2755.
5. Saha, S., et al., *Discovery of Unusual Cyanobacterial Tryptophan-Containing Anabaenopeptins by MS/MS-Based Molecular Networking*. Molecules, 2020. **25**(17): p. 3786.
6. Reshef, V. and S. Carmeli, *Schizopeptin 791, a New Anabaenopeptin-like Cyclic Peptide from the Cyanobacterium Schizothrix sp.* Journal of Natural Products, 2002. **65**(8): p. 1187-1189.
7. Sanz, M., et al., *Structural Characterization of New Peptide Variants Produced by Cyanobacteria from the Brazilian Atlantic Coastal Forest Using Liquid Chromatography Coupled to Quadrupole Time-of-Flight Tandem Mass Spectrometry*. Marine Drugs, 2015. **13**(6): p. 3892-3919.
8. Häggqvist, K., et al., *Morphologic, Phylogenetic and Chemical Characterization of a Brackish Colonial Picocyanobacterium (Coelosphaeriaceae) with Bioactive Properties*. Toxins, 2016. **8**(4): p. 108.
9. Mazur-Marzec, H., et al., *Chemical and Genetic Diversity of Nodularia spumigena from the Baltic Sea*. Marine Drugs, 2016. **14**(11): p. 209.
10. Mazur-Marzec, H., et al., *Diversity of Peptides Produced by Nodularia spumigena from Various Geographical Regions*. Marine Drugs, 2013. **11**(1): p. 1-19.
11. Mazur-Marzec, H., et al., *Nodularia spumigena Peptides—Accumulation and Effect on Aquatic Invertebrates*. Toxins, 2015. **7**(11): p. 4404-4420.
12. Fujii, K., et al., *Structural elucidation of cyanobacterial peptides encoded by peptide synthetase gene in Anabaena species*. Tetrahedron, 2002. **58**(34): p. 6863-6871.
13. Fujii, K., et al., *Occurrence of novel cyclic peptides together with microcystins from toxic cyanobacteria, Anabaena species*, in *Harmful and Toxic Algal Blooms*, T. Yasumoto, Y. Oshima, and Y. Fukuyo, Editors. 1996, Intergovernmental Oceanographic Commission of UNESCO: Paris, France. p. 559-562.
14. Guljamow, A., et al., *High-Density Cultivation of Terrestrial Nostoc Strains Leads to Reprogramming of Secondary Metabolome*. Applied and Environmental Microbiology, 2017. **83**(23): p. e01510-17.
15. Plaza, A., et al., *Paltolides A-C, anabaenopeptin-type peptides from the Palau sponge theonella swinhoei*. Journal of Natural Products, 2010. **73**(3): p. 485-488.
16. Spoof, L., et al., *Structures and Activity of New Anabaenopeptins Produced by Baltic Sea Cyanobacteria*. Marine Drugs, 2016. **14**(1): p. 8.
17. Welker, M., et al., *Detection and identification of oligopeptides in Microcystis (cyanobacteria) colonies: Toward an understanding of metabolic diversity*. Peptides, 2006. **27**(9): p. 2090-2103.
18. Schreuder, H., et al., *Isolation, Co-Crystallization and Structure-Based Characterization of Anabaenopeptins as Highly Potent Inhibitors of Activated Thrombin Activatable Fibrinolysis Inhibitor (TAFIa)*. Scientific Reports, 2016. **6**.
19. Riba, M., et al., *Chemotyping of terrestrial Nostoc-like isolates from alkali grassland areas by non-targeted peptide analysis*. Algal Research, 2020. **46**: p. 101798.
20. Harada, K.-i., et al., *Two cyclic peptides, anabaenopeptins, a third group of bioactive compounds from the cyanobacterium Anabaena flos-aquae NRC 525-17*. Tetrahedron Letters, 1995. **36**(9): p. 1511-1514.
21. Rouhiainen, L., et al., *Two Alternative Starter Modules for the Non-Ribosomal Biosynthesis of Specific Anabaenopeptin Variants in Anabaena (Cyanobacteria)*. Chemistry and Biology, 2010. **17**(3): p. 265-273.
22. Riba, M., et al., *Microcystis chemotype diversity in the alimentary tract of bigheaded carp*. Toxins, 2019. **11**(5).
23. Zafrir-Ilan, E. and S. Carmeli, *Eight novel serine proteases inhibitors from a water bloom of the cyanobacterium Microcystis sp.* Tetrahedron, 2010. **66**(47): p. 9194-9202.
24. Shin, H.J., et al., *Anabaenopeptins E and F, two new cyclic peptides from the cyanobacterium Oscillatoria agardhii (NIES-204)*. Journal of Natural Products, 1997. **60**(2): p. 139-141.
25. Adiv, S. and S. Carmeli, *Protease Inhibitors from Microcystis aeruginosa Bloom Material Collected from the Dalton Reservoir, Israel*. Journal of Natural Products, 2013. **76**(12): p. 2307-2315.
26. Ferranti, P., et al., *A peptidomic approach for monitoring and characterising peptide cyanotoxins produced in Italian lakes by matrix-assisted laser desorption/ionisation and quadrupole time-of-flight mass spectrometry*. Rapid Communications in Mass Spectrometry, 2011. **25**(9): p. 1173-1183.
27. Sano, T. and K. Kaya, *Oscillamide Y, a chymotrypsin inhibitor from toxic Oscillatoria agardhii*. Tetrahedron Letters, 1995. **36**(33): p. 5933-5936.

28. Müller, D., et al., *Brunsvicamides A–C: Sponge-Related Cyanobacterial Peptides with Mycobacterium tuberculosis Protein Tyrosine Phosphatase Inhibitory Activity*. Journal of Medicinal Chemistry, 2006. **49**(16): p. 4871–4878.
29. Schmidt, E.W., M.K. Harper, and D.J. Faulkner, *Mozamides A and B, Cyclic Peptides from a Theonellid Sponge from Mozambique*. Journal of Natural Products, 1997. **60**(8): p. 779–782.
30. Grach-Pogrebinsky, O. and S. Carmeli, *Three novel anabaenopeptins from the cyanobacterium Anabaena sp.* Tetrahedron, 2008. **64**(44): p. 10233–10238.
31. Zi, J., et al., *Lyngbyaureidamides A and B, two anabaenopeptins from the cultured freshwater cyanobacterium Lyngbya sp. (SAG 36.91)*. Phytochemistry, 2012. **74**: p. 173–177.
32. Beresovsky, D., et al., *Toxins and biologically active secondary metabolites of Microcystis sp. isolated from Lake Kinneret*. Israel Journal of Chemistry, 2006. **46**(1): p. 79–87.
33. Kodani, S., et al., *Five new cyanobacterial peptides from water bloom materials of lake Teganuma (Japan)*. FEMS Microbiology Letters, 1999. **178**(2): p. 343–348.
34. Williams, D.E., et al., *Ferintoic Acids A and B, New Cyclic Hexapeptides from the Freshwater Cyanobacterium Microcystis aeruginosa*. Journal of Natural Products, 1996. **59**(6): p. 570–575.
35. Sano, T., et al., *Isolation of new protein phosphatase inhibitors from two cyanobacteria species, Planktothrix spp.* Journal of Natural Products, 2001. **64**(8): p. 1052–1055.
36. Kobayashi, J., et al., *Konbamide, a novel peptide with calmodulin antagonistic activity from the Okinawan marine sponge Theonella sp.* Journal of the Chemical Society, Chemical Communications, 1991(15): p. 1050–1052.
37. Gesner-Apter, S. and S. Carmeli, *Protease inhibitors from a water bloom of the cyanobacterium Microcystis aeruginosa*. Journal of Natural Products, 2009. **72**(8): p. 1429–1436.
38. Schumacher, M., et al., *New nodulopeptins from Nodularia spumigena KAC 66*. Tetrahedron, 2012. **68**(5): p. 1622–1628.
39. Bober, B., E. Chrapusta-Srebrny, and J. Bialczyk, *Novel cyanobacterial metabolites, cyanopeptolin 1081 and anabaenopeptin 899, isolated from an enrichment culture dominated by Woronichinia naegeliana (Unger) Elenkin*. European Journal of Phycology, 2020: p. 1–11.
40. Puddick, J. and M.R. Prinsep, *MALDI-TOF mass spectrometry of Cyanobacteria: a global approach to the discovery of novel secondary metabolites*. 2008.
41. Elkobi-Peer, S. and S. Carmeli, *New Prenylated Aeruginosin, Microphycin, Anabaenopeptin and Micropeptin Analogues from a Microcystis Bloom Material Collected in Kibbutz Kfar Blum, Israel*. Marine Drugs, 2015. **13**(4): p. 2347–2375.
42. Erhard, M., H. Von Döhren, and P.R. Jungblut, *Rapid identification of the new anabaenopeptin G from Planktothrix agardhii HUB 011 using matrix-assisted laser desorption/ionization time-of-flight mass spectrometry*. Rapid Communications in Mass Spectrometry, 1999. **13**(5): p. 337–343.
43. Okumura, H.S., et al., *Homotyrosine-containing cyanopeptolins 880 and 960 and anabaenopeptins 908 and 915 from Planktothrix agardhii CYA 126/8*. Journal of Natural Products, 2009. **72**(1): p. 172–176.
44. Fujii, K., et al., *Comparative study of toxic and non-toxic cyanobacterial products: Novel peptides from toxic Nodularia spumigena AV1*. Tetrahedron Letters, 1997. **38**(31): p. 5525–5528.
45. Itou, Y., et al., *Anabaenopeptins G and H, Potent Carboxypeptidase A inhibitors from the cyanobacterium Oscillatoria agardhii (NIES-595)*. Bioorganic & Medicinal Chemistry Letters, 1999. **9**(9): p. 1243–1246.
46. Uemoto, H., et al., *Keramamides K and L, new cyclic peptides containing unusual tryptophan residue from Theonella sponge*. Tetrahedron, 1998. **54**(24): p. 6719–6724.
47. Robinson, S.J., et al., *Probing the Bioactive Constituents from Chemotypes of the Sponge Psammocinia aff. bulbosa*. Journal of Natural Products, 2007. **70**(6): p. 1002–1009.
48. Kobayashi, J.I., et al., *Keramamide A, a novel peptide from the Okinawan marine sponge Theonella sp.* Journal of the Chemical Society, Perkin Transactions 1, 1991(10): p. 2609–2611.
49. Matthew, S., et al., *Pompanopeptins A and B, new cyclic peptides from the marine cyanobacterium Lyngbya confervoides*. Tetrahedron, 2008. **64**(18): p. 4081–4089.
